# Supplementary material
Source: publisher figshare collection journal article supplement (https://sage.figshare.com/ndownloader/files/30771733)
Supplement: Supplementary file 1 [file 30771733]

## **Supplementary materials**

### **Appendix A (Pilot-Study)**

*Participants:* 57 typically-developing monolingual British-English speaking children ( $N = 25$  boys; Mean age = 90.56 months, range 73-109 months)

*Task:* Five video-based mini interactions between two protagonists, ending with an indirect statement. The child is asked to select one of the three options which best summarises what the speaker means.

*Example:* Sam and Tom play in the same football team.

Sam: “Tom, we desperately need you to play in the football match today”

Tom: “I don’t feel well. I’m coughing and sneezing”.

DV (forced choice, reaction time): “What does Tom mean?”

- A. I can’t play because the weather is not good for playing football.
- B. I am warning you of my cold so you don’t catch it.
- C. I can’t play in your football match because I’m ill.

*Additional measures:* Nonverbal IQ (NVIQ, assessed using the ‘Matrices’ sub-test of the British Ability Scale – 3, Elliot & Smith, 2011), sentence production (assessed using the ‘Formulated Sentences’ sub-test of the Clinical Evaluation of Language Fundamentals – Fifth Edition, Wiig, Semel & Secord, 2013), real-world knowledge (assessed using the ‘Information’ sub-test of the WISC, Wechsler, 2003), and Theory of Mind (assessed using four items from Happé’s (1994) ‘Strange Stories’).

## Results:

**Table 7.**

Correlation matrix showing relationships between the variables assessed in Pilot-Study.

|                                               | 1.               | 2.     | 3.    | 4.     | 5.    | 6. |
|-----------------------------------------------|------------------|--------|-------|--------|-------|----|
| 1. Relevance Inferencing                      | -                |        |       |        |       |    |
| 2. Age in months<br>(N = 57)                  | .21              | -      |       |        |       |    |
| 3. NVIQ<br>raw score (N = 53)                 | -.09             | .48**  | -     |        |       |    |
| 1. Expressive Language<br>raw score (N = 57)  | .38**            | .59*** | .32*  | -      |       |    |
| 2. Real-world Knowledge<br>raw score (N = 57) | .22 <sup>∇</sup> | .64*** | .56** | .66*** | -     |    |
| 3. Theory of Mind (N= 52)                     | .25 <sup>∇</sup> | .43**  | .29*  | .52*** | .45** |    |

<sup>∇</sup> =  $p < .1$

\* =  $p < .05$

\*\* =  $p < .01$

\*\*\* =  $p < .001$

In a linear regression analysis (N = 51) only core language (CELF ‘Formulated Sentences’) was a significant predictor for Relevance Inferencing ( $\beta = .39$ ,  $SE = .004$ ,  $t = 2.044$ ,  $p = .047$ ), accounting for 7% unique variance as assessed by the squared part correlation. The model itself ( $F(5, 45) = 2.43$ ,  $p = .05$ ) accounted for 13% of variance.

## Appendix B (Materials for Study 1 and Study 2)

1.

a. Positive statement

Girl puppet: [BIG YAWN] Oh, I slept really well.

Boy puppet: [BIG YAWN] I'm really hungry. I'd like to have breakfast.

Girl puppet: Do you want cereal or toast?

Boy puppet: There's milk.

Target picture: cereal.

Foil picture: toast.

b. Negative statement

Girl puppet: [BIG YAWN] Oh, I slept really well.

Boy puppet: I'm really hungry. I'd like to have breakfast.

Girl puppet: Do you want cereal or toast?

Boy puppet: The milk's all gone.

Foil picture: cereal.

Target picture: toast.

2.

a. Positive statement

Boy puppet: We need to look after our pets.

Girl puppet: Do you want to walk the dog or feed the cat?

Boy puppet: I've got a lead.

Target picture: dog.

Foil picture: cat.

b. Negative statement  
Boy puppet: We need to look after our pets.

Girl puppet: Do you want to walk the dog or feed the cat?

Boy puppet: The lead is broken.

Target picture: cat.

Foil picture: dog.

3.

a. Positive statement

Boy puppet: Let's get dressed.

Girl puppet: Do you want to wear your scarf or your sunglasses?

Boy puppet: It is hot and sunny outside.

Target picture: Sunglasses

Foil picture: Scarf

b. Negative statement  
Boy puppet: Let's get dressed.

Girl puppet: Do you want to wear your scarf or your sunglasses?

Boy puppet: It isn't hot and sunny outside.

Target picture: scarf.

Foil picture: sunglasses

4.

a. Positive statement

Boy puppet: Snacktime!

Girl puppet: What should we eat? Cake or biscuits?

Boy puppet: I've got a knife.

Target picture: cake

Foil picture: biscuits.

b. Negative statement

Boy puppet: Snacktime!

Girl puppet: What should we eat? Cake or biscuits?

Boy puppet: We don't have a knife.

Target picture: biscuits.

Foil picture: cake.

5.

a. Positive statement

Boy puppet: Let's have a healthy snack.

Girl puppet: What should we have? Orange juice or an apple?

Boy puppet: Our cups are clean.

Target picture: orange juice.

Foil picture: apple.

b. Negative statement

Boy puppet: Let's have a healthy snack.

Girl puppet: What should we have? Orange juice or an apple?

Boy puppet: Our cups are dirty.

Target picture: apple.

Foil picture: juice.

6.

a. Positive statement

Boy puppet: Let's get ready for bed

Girl puppet: Are you going to brush your teeth or your hair?

Boy puppet: We have toothpaste

Target picture: Toothbrush.

Foil picture: Hairbrush

b. Negative statement

Boy puppet: Let's get ready for bed

Girl puppet: Are you going to brush your teeth or your hair?

Boy puppet: We don't have any toothpaste left.

Target picture: Hairbrush

Foil picture: Toothbrush.
